1 **Integration of a *FT* expression cassette into CRISPR/Cas9 construct enables fast**  
2 **generation and easy identification of transgene-free mutants in *Arabidopsis***

3 Yuxin Cheng<sup>1§</sup>, Na Zhang<sup>1§</sup>, Saddam Hussain<sup>1</sup>, Sajjad Ahmed<sup>1</sup>, Wenting Yang<sup>1</sup>,  
4 Shucai Wang<sup>1,2\*</sup>

5 <sup>1</sup>Key Laboratory of Molecular Epigenetics of MOE, Northeast Normal University,  
6 Changchun, China

7 <sup>2</sup>College of Life Science, Linyi University, Linyi, China

8

9 §These authors contributed equally to this work.

10

11 \*Corresponding author

12 Shucai Wang

13 School of Life Sciences

14 Northeast Normal University

15 Changchun, China

16 Tel.: +86 431 85099552

17 Fax: +86-431-85683843

18 E-mail: [wangshucai@yahoo.com](mailto:wangshucai@yahoo.com)

20 **Abstract**

21 The CRISPR/Cas9 genome editing technique has been widely used to generate  
22 transgene-free mutants in different plant species. Several different methods including  
23 fluorescence marker-assisted visual screen of transgene-free mutants and programmed  
24 self-elimination of CRISPR/Cas9 construct have been use to increase the efficiency of  
25 genome edited transgene-free mutants isolation, but the overall time length required to  
26 obtain transgene-free mutants has remained unchanged in these methods. We report  
27 here a method for fast generation and easy identification of transgene-free mutants in  
28 Arabidopsis. By generating and using a single *FT* expression cassette-containing  
29 CRISPR/Cas9 construct, we targeted two sites of the *AITR1* gene. We obtained many  
30 early bolting plants in T1 generation, and found that about two thirds of these plants  
31 have detectable mutations. We then analyzed T2 generations of two representative  
32 lines of genome edited early bolting T1 plants, and identified plants without early  
33 bolting phenotype, i.e., transgene-free plants, for both lines. Further more,  
34 homologues *aitr1* mutants were successful obtained for both lines from these  
35 transgene-free plants. Taken together, these results suggest that the method described  
36 here enables fast generation, and at the mean time, easy identification of  
37 transgene-free mutants in plants.

38

39 **Keywords:** CRISPR/Cas9; genome editing; bolting time; FT; AITR1

## 40 **Introduction**

41 Shortly after the CRISPR (clustered regularly interspaced short palindromic repeats)  
42 RNA-guided Cas9 (CRISPR-associated protein 9) endonuclease being reported to be  
43 able to cleave double-stranded DNA, therefore generate mutations in eukaryotic cells  
44 [1,2], CRISPR/Cas9 mediated genome-editing has been successful used for gene  
45 editing to generate mutations in several different plants including the model plant  
46 Arabidopsis and crops such as rice, tobacco and wheat [3-5]. Since then, the  
47 CRISPR/Cas9 genome-editing techniques including the double-stranded DNA  
48 cleaving based editing and the nucleotide substitution based editing have been widely  
49 used to generate mutations in different plant species, in some cases, to improve  
50 agronomic traits such as yield, quality and biotic and abiotic stress tolerances [6-12].  
51 Thanks to their high efficiency in genome editing and the used of engineered Cas9  
52 variants with expanded target space, CRISPR/Cas9 genome-editing systems have  
53 brought a bright future for plant breeding [6,12-14].

54 The presence of Cas9 T-DNA in CRISPR/Cas9 genome-edited mutants may  
55 affect the phenotypic stability and heritability of the mutation, and transgene-free is  
56 likely required for commercial application of CRISPR/Cas9 genome-edited crops [7,  
57 10]. Therefore, isolation of transgene-free mutants is one of the most important steps  
58 for generation mutants by using CRISPR/Cas9 genome-editing. However, isolation of  
59 transgene-free mutants by using the traditional genetic segregation and backcross  
60 based genotyping is time consuming and laborious [7,8,10]. To improve the efficiency  
61 in transgene-free mutant isolation from CRISPR/Cas9 genome edited plants, a few

62 different methods have been established [6-8,10]. These methods include the  
63 fluorescence marker-assisted selection, which allows to isolation transgene-free  
64 mutants based on the observation of the absence of fluorescence in seeds produced by  
65 transgenic plants [7]; the active interference element mediated selection, which allows  
66 herbicide-dependent isolation of transgene-free plants [8]; and the programmed  
67 self-elimination system, which allows only transgene-free male gametophytes to  
68 produce seeds [13]. All these methods greatly reduced workload for transgene-free  
69 mutant isolation. However, the overall time length required for the whole process of  
70 mutant generation, from plant transformation, to mutant identification, and then  
71 transgene-free mutant isolation remained largely unchanged.

72 Appreciate flowering time is critical for successful sexual reproduction in  
73 flowering plants [15]. In order to achieve sexual reproductive successful, flowering  
74 plants need to sense and respond to environmental stimuli appropriately, and then  
75 integrate the environmental information with endogenous signals to make transit from  
76 vegetative growth to flowering [16-18]. Accumulated evidence suggest that flowering  
77 time in Arabidopsis is controlled by several different regulators, including CO  
78 (CONSTANS), SOC1 (SUPPRESSOR OF CONSTANS OVEREXPRESSION1), FLM  
79 (FLOWERING LOCUS M), FLC, FLK (FLOWERING LOOCUS K HOMOLOGY  
80 (KH) DOMAIN), VRN2 (VERNALIZATION 2), MAF2 (MADS AFFECTING  
81 FLOWERING 2) and FT (FLOWERING LOCUS T) [15,17,19-24]. Among them,  
82 FLC and CO are major regulators involved in vernalization and photoperiod, the two  
83 most important environmental stimuli that control the switch from vegetative growth

84 to flowering, respectively, and they function immediately upstream of FT to regulate  
85 the switch [15-17].

86 FT is the key positive regulator of flowering in Arabidopsis, and at least some of  
87 the FT homologues in other plants species including medicago, rice, soybean and  
88 trees like poplar and pear also function as activator of flowering [25-28]. Due to its  
89 important role in flowering promotion, FT has been successfully used to reducing  
90 juvenile phase of many plants, therefore accelerated the process for plant breeding  
91 [15,27,29].

92 Considering that early flowering phenotype caused by overexpression of *FT* in  
93 plants is easy visible, and the resulted short life cycle will accelerate mutants  
94 generation, integration of a FT expression cassette into CRISPR/Cas9 may enable fast  
95 generation and easy identification of transgene-free mutants in plants. In this study,  
96 we introduced a *GmFT2a* expression cassette into the *pHEE* CRISPR/Cas9 vector,  
97 and inserted two *sgRNA* expression cassettes to target the *AITR1* (*ABA induced*  
98 *transcription repressor1*) gene, which encodes a novel ABA signaling and abiotic  
99 stress tolerance regulating transcription factor in Arabidopsis [30]. We successfully  
100 obtained detectable mutations in *AITR1* in early bolting T1 Arabidopsis transgenic  
101 plants, and obtained homologues transgene-free *aitr1* mutants from T2 plants with  
102 normal bolting phenotypes.

## 104 **Results**

### 105 **Generation of a *FT* expression cassette-containing CRISPR/Cas9 construct**

106 Overexpression of *FT* in plants promoted flowering, therefore shorten the juvenile  
107 phase of the transgenic plants even in trees [27]. If used in CRISPR/Cas9 mediated  
108 gene editing, the easy visible early bolting phenotype caused by overexpression of *FT*  
109 may serve as an assistant selection marker for easy identification of transgene-free  
110 mutants, whereas shorten in juvenile phase resulted by early flowering may reduce the  
111 length of the overall time required for generating genome edited mutants, thereby  
112 providing a method for fast generation and easy identification of genome edited  
113 transgene-free mutants.

114 Considering that overexpression of *GmFT2a* in both Arabidopsis and soybean  
115 promoted flowering in transgenic plants [31,32], we decided to integrate a *GmFT2a*  
116 expression cassette into CRISPR/Cas9 vector for gene editing. The full-length coding  
117 sequence of *GmFT2a* was synthesized, and cloned into to the *pUC19* vector to  
118 generate the *35S:GmFT2a* construct. The whole *35S:GmFT2a-nos* expression cassette  
119 was then PCR amplified and cloned into the *pHEE* vector [33], at the *pme1* site to  
120 generate the *FT* expression cassette-containing CRISPR/Cas9 vector *pHEE-FT*  
121 (Figure 1a). In this vector, the *FT* expression cassette was inserted within the T-DNA  
122 fragment of the *pHEE-FT* vector as an independent expression cassette, and the  
123 expression of *GmFT2a* was controlled by the strong double *35S* promoter, which  
124 enables that *GmFT2a* can be expressed in a high level in transgenic plants generated  
125 by using the *pHEE-FT* vector, therefore may led to an easy visible early flowering

126 phenotype in the transgenic plants.

127

128 **T1 transgenic plants generated using the *FT* expression cassette-containing**  
129 **CRISPR/Cas9 construct showed an early bolting phenotype**

130 To examine if the genome editing using the *pHEE-FT* vector may enable fast  
131 generation and easy identification of transgene-free mutants, we made a *pHEE-FT*  
132 CRISPR/Cas9 genome editing construct to target *AITR1* (Figure 1b), a novel  
133 transcription factor gene that has been shown to regulate ABA signaling and abiotic  
134 tolerance in Arabidopsis [30], at two different target sites (Figure 1c).

135 After selected on antibiotic-containing plates, more than 70 T1 independent  
136 transgenic plants were obtained. As expected, early bolting phenotype was observed  
137 in the transgenic plants (Figure 2a). Bolting was observed in transgenic plants as early  
138 as 8 days after the seedlings were transferred from the antibiotic-containing plates into  
139 soil pots, and the bolting time for these T1 transgenic plants ranged from 8-19 days  
140 after the transfer, whereas that in the Col wild type plants ranged from 17-20 days  
141 after the transfer (Figure 2b).

142

143 **Homozygous genome edited mutants were obtained in the T1 transgenic plants**

144 The *pHEE-FT-AITR1* CRISPR/Cas9 construct was made to target two sites in *AITR1*,  
145 therefore fragment deletion should be expected in the transgenic plants if both sites  
146 can be edited. Because we intended to use early bolting phenotype as an assistant  
147 marker for transgene-free mutant isolation, transgenic plants with an early bolting

148 phenotype, i.e., bolted 8 or 9 days after transferred, were chosen for fragment deletion  
149 examination by PCR. Yet we included a few plants with medium or normal bolting  
150 time in this experiment to examine if this is a co-relationship between early bolting  
151 phenotype and genome editing status.

152 Indeed, smaller PCR product band was obtained (Figure 3a). However, among  
153 about 50 T1 plants examined, only two plants, i.e., lines 14 and 59 with early and  
154 medium bolting phenotype, respectively yield two PCR bands, but none of them  
155 produced only one smaller band (Figure 3b). All other plants produced only one larger  
156 PCR band with expected site for the full-length coding sequence of *AITRI* (Figure 3b).  
157 These results suggest that both target sites in *AITRI* can be edited, but homozygous  
158 fragment deletion mutants were not obtained in the plants examined.

159 We therefore sequenced the full-length *AITRI* PCR products obtained from some  
160 of the plants that only produced one PCR product band, to see if we may get  
161 homozygous mutants with only one *AITRI* target site edited. Indeed, two of the early  
162 bolting plants, lines 11 and 15 were identified as homozygous mutants with a single  
163 nucleotide insertion at the second target site of *AITRI* (Figure 3b). One of the T1  
164 plants with normal bolting phenotype was edited at the second site with a single  
165 nucleotide insertion, but was a biallelic mutant (Figure 3b). We also found that  
166 another 9 early bolting plants sequenced was edited in one of the target sites but were  
167 not homozygous (Figure 3b). It should note that among the single site edited mutant,  
168 only one was edited at the first target site (Figure 3b).

169



170 **Homozygous genome edited transgene-free mutants were obtained in the T2**  
171 **plants**

172 Having shown that homozygous mutants can be obtained in early bolting T1  
173 transgenic plants (Figure 3), we decided to further examine whether transgene-free  
174 mutants can be easily obtained in T2 generation base on phenotypic observation. Two  
175 represent early mutant lines, i.e., line 14 and 15 were chosen, and T2 seeds were  
176 germinated directly in soil pots. Line 14 was chosen because PCR results indicated  
177 that both target sites of *AITRI* were edited in this line, where as line 15 was a  
178 homozygous mutant identified in T1 generation.

179 Segregation on bolting phenotype was observed in T2 plants (Figure 4a). Multiple  
180 plants without early bolting phenotype were obtained for both lines, and the  
181 segregation ratio for early and normal bolting plants were about 3:1 (Figure 4b).

182 We then examined if the plants without early bolting phenotype were  
183 transgene-free plants by amplification of *Cas9* gene. As shown in Figure 5, no PCR  
184 products were obtained in all the normal bolting plants examined, whereas PCR  
185 products were obtained in early bolting plants. These results suggest that  
186 transgene-free plants can be easily identified by observation of bolting phenotype.

187 By using PCR amplification, we found that two of the normal flowering plants in  
188 line 14 produced only a small band (Figure 6a), indicating that they were homozygous  
189 mutants. Sequence result showed that a 428bp fragment in *AITRI* was deleted in this  
190 mutant, leading to a few amino acid substitutions and premature stop after the 89<sup>th</sup>  
191 amino acid residue (Figure 6a).

192 We also sequenced AITR PCR product from one of the transgene-free plants  
193 obtained from line 15 to confirm the genome editing status. We found that it was  
194 indeed a homozygous mutant with a single nucleotide insertion occurred in the  
195 sequence of the second target site. In this mutant, the single nucleotide insertion  
196 *AITR1* also led to a few amino acid substitutions, and premature stop occurred after  
197 the 232<sup>nd</sup> amino acid residue (Figure 6b).

198

200 **Discussion**

201 CRISPR/Cas9 genome-editing has been used to generate mutants in different plant  
202 species [6-12], and may have a bright future in using for plant breeding [6,12-14].  
203 However, remove of the Cas9 T-DNA from the transgenic plants is likely necessary to  
204 get stable and heritable mutants, especially for commercial use of the genome-edited  
205 crops [7,10].

206 FT promotes flowering in many plant species including the model plants  
207 Arabidopsis, crops such as rice and soybean, and fruit trees such as apple and pear  
208 [24-27,33], and has been used to accelerate plant breeding process by reducing  
209 juvenile phase of many plants [15,27,29].

210 By inserting the *GmFT2a* expression cassette into the *pHEE* CRISPR/Cas9 vector  
211 (Figure 1), we established a method for fast generation and easy identification of  
212 genome-edited transgene-free mutants in Arabidopsis (Figure 7).

213 In this method, the easy visible early flowering phenotype can be used as an  
214 indicator of plants with Cas9 T-DNA. In the T1 generation, only plants with early  
215 bolting phenotypes should be selected and genome editing status should be examined  
216 to identify mutations. In the T2 generation of the genome-edited T1 plants, only plants  
217 without early flowering phenotypes, i.e., transgene-free plants should be selected, and  
218 genome editing status should be examined to ensure that genome-edited  
219 transgene-free homozygous mutants will be obtained (Figure 7).

220 By using the *pHEE-FT* vector to generate a CRISPR/Cas9 genome editing  
221 construct for simultaneously targeting two sites in the ABA signaling and abiotic

222 stress tolerance regulator gene *AITR1* [30], we successfully obtained genome-edited  
223 transgene-free *aitr* homozygous mutants (Figure 6). In the T1 generation, about two  
224 thirds of the early bolting plants examined have at least one target site edited (Figure  
225 3), indicating that insertion of the *GmFT2a* expression cassette into the CRISPR/Cas9  
226 vector did not affect the editing efficiency of Cas9. However, we noted that including  
227 the two plants with fragment deletion, only three plants had mutations at the first  
228 target site, suggesting that the two targets selected have different editing efficiency.  
229 Had both target sites have high editing efficiency, we should able to obtained  
230 homozygous fragments deletion mutants in T1 generation. Nevertheless, we obtained  
231 homozygous mutants with mutations occurred at only one target site from the T1  
232 plants (Figure 3), and we obtained homozygous fragments deletion mutants in T2  
233 generations (Figure 6).

234 Even though only the double-stranded DNA cleave based CRISPR/Cas9  
235 genome-editing system was examined in this study, however, the concept used in this  
236 study may also applied to the nucleotide substitution based CRISPR/Cas9  
237 genome-editing system to facility transgene-free mutant isolation.

238 It should note that target site editing were also observed in T1 transgenic plants  
239 with medium or normal bolting time (Figure 3), suggesting that editing efficiency may  
240 not positively correlated with early bolting phenotypes. This is likely because *FT* and  
241 *Cas9* in the vector were in two different expression cassettes, and were driven by  
242 different promoters (Figure 1), thus their expression levels may not always positively  
243 related in the transgenic plants. Consider that mutants can obtained from early bolting

244 T1 plants based on PCR results only or combined with sequencing (Figure 2), and  
245 transgene-free plants can be easily obtained from offsprings of the early bolting T1  
246 plants based solely on bolting phenotype segregation (Figure 5), only T1 plants with  
247 early bolting phenotypes should be selected for next step analysis when using this  
248 method to generate for genome edited transgene-free mutants.

249 In addition to enable easy identification of transgene-free mutants base on  
250 phenotypic observation, the early bolting phenotype also reduce the length of the  
251 juvenile phase, which led to reduced overall time length required for generating  
252 genome edited transgene-free mutants. In our case, the different bolting time between  
253 early bolting transgenic plants and Col wild type plants were more than 10 days  
254 (Figure 2). Because early bolting plants were selected in T1, but plants with normal  
255 bolting time were selected in T2, the overall time length required for generating  
256 genome edited transgene-free mutants in Arabidopsis will be reduced at least 10 days.  
257 In some cases, transgene-free mutants may not be able to be identified in T2  
258 generations, and had to be identified on T3 generations. In that case, identify mutant  
259 from offsprings of the gene-edited early bolting T2 plants may save more time than  
260 from that of the transgene-free heterozygous T2 mutants.

261 In this study, the effects of integration of *FT* expression cassette into  
262 CRISPR/Cas9 vector to accelerate transgene-free mutant isolation was tasted only in  
263 Arabidopsis, however, considering that the juvenile phase for most of the crops such  
264 as rice and soybean lasts for months, and that for most of the trees including fruit trees  
265 apple and pear lasts for years, whereas overexpression of *FT* greatly reduced the

266 length of juvenile phase in most of the plants examined, including all the plants  
267 mentioned above [25-28,34-36], the method described here may benefit even more for  
268 genome editing based breeding for the plants with a long juvenile phase.

269       On the other hand, transgenic plants of different plant species may need to be  
270 selected in different antibiotics, and multiple genes may need to be edited  
271 simultaneously, by replacing the antibiotic gene and/or the sgRNA clone cassette, the  
272 pHEE-FT vector reported here may be used for genome editing for a single or  
273 multiple genes in different plant species.

## 275 **Materials and methods**

### 276 **Plant materials and growth conditions**

277 The Columbia ecotype ‘Col-0’ (Col) *Arabidopsis* (*Arabidopsis thaliana*) was used for  
278 plant transformation, and as controls for bolting time assays.

279 Seeds of Col wild type were germinated in soil pots, and grown in a growth room.  
280 T1 transgenic plants were selected by plating T1 seeds on antibiotic-containing 1/2  
281 MS plates. Transgenic seedlings were transferred into soil pots, and grown in a  
282 growth room. As a control, seeds of Col wild type were germinated on 1/2MS plates,  
283 seedlings were transferred into soil pots and grown in a growth room. The growth  
284 conditions in the growth room have been described previously [37,38].

285

### 286 **Constructs**

287 The *pHEE* CRISPR/Cas9 vector has been described previously [33]. To insert the FT  
288 expression cassette into *pHEE* to generate the *pHEE-FT* vector, the full-length open  
289 reading frame (ORF) sequence of *GmFT2a* was synthesized and cloned into *pUC19*  
290 under the control of the double *35S* promoter, and terminated by *nos* [39]. The  
291 sequence of the *35S:GmFT2a-nos* cassette was then amplified by PCR, and cloned  
292 into the *pHEE* vector at the *Pme*I site by using Gibson assembly. The primers used to  
293 amplify *35S:GmFT2a-nos* from the *pUC19* construct were:  
294 5’-CCTGTCAAACACTGATAGTTTGTCTCGACTCTAGAGGATCC-3’ and  
295 5’-GTCGTTTCCCGCCTTCAGTTTACGACGGCCAGTGAATTC-3’.

296 To generate CRISPR/Cas9 construct for genome editing of *AITR1*, appropriate

297 target sequences were first identified by scanning coding sequence of *AITRI* on  
298 CRISPRscan (<http://www.crisprscan.org/?page=sequence>), and then evaluated on  
299 Cas-OFFinder (<http://www.rgenome.net/cas-offinder/>). Two target sequences were  
300 selected and used for editing of *AITRI*, 5'-GATCTGACTTGTCTGATGAT(CGG)-3',  
301 and 5'-GGTGGCGGAGGAGGCAACGG(CGG)-3'. The sgRNA expression cassettes  
302 targeting *AITRI* were cloned into the *pHEE-FT* vector to generate *pHEE-FT-AITRI*  
303 construct by following the procedures described by Wang et al [39]. The primers used  
304 to insert the target sequences into sgRNA expression cassettes were, *DT1-BsF*,  
305 5'-ATATATGGTCTCGATTGATCTGACTTGTCTGATGATGTT-3', *DT1-F0*, 5'-T  
306 GATCTGACTTGTCTGATGATGTTTTAGAGCTAGAAATAGC-3', *DT2-R0*,  
307 5-AACCCGTTGCCTCCTCCGCCACCAATCTCTTAGTCGACTCTAC-3', and  
308 *DT2-BsR*, 5'-ATTATTGGTCTCGAAACCCGTTGCCTCCTCCGCCACC-3'. The  
309 primers used for colony PCR and to sequence the sgRNA expression cassettes in the  
310 generated *pHEE-FT-AITRI* construct were, *U6-26-IDF*,  
311 5'-TGTCCCAGGATTAGAATGATTAGGC-3' and *U6-26-IDR*,  
312 5'-AGCCCTCTTCTTTCGATCCATCAAC-3'.

313

### 314 **Plant transformation and transgenic plant selection**

315 Col wild type plants have several mature flowers on the main inflorescence  
316 (~5-week-old) were used for transformation. The plants were transformed via  
317 *Agrobacterium GV3101* mediated floral dipping [40]. T1 seeds collected were  
318 germinated on 1/2 MS plates containing 30 µg/ml hygromycin and 100 µg/ml



319 carbenicillin to select transgenic plants.

320 Bolting time of the T1 plants was observed, and gene editing status was examined  
321 by amplifying the coding sequence of *AITRI* and sequencing the PCR products  
322 obtained.

323

### 324 **Isolation of transgene-free homozygous mutants**

325 T2 seeds were collected from selected plants that bolting early and with *AITRI* gene  
326 edited. The seeds were then sown directly into soil pots. T2 plants with normal bolting  
327 time were selected, the absence of *Cas9* T-DNA insertion was confirmed by PCR  
328 amplification of *Cas9* fragment, and gene editing status was further  
329 examined/confirmed amplifying the coding sequence of *AITRI* and sequencing the  
330 PCR products obtained.

331

### 332 **DNA isolation and PCR**

333 To examine gene editing status of *AITRI*, DNA was isolated from leaves of the  
334 transgenic plants, and the coding sequence of *AITRI* was amplified by PCR. PCR  
335 products was recovered from gel and sequenced. The sequencing results obtained  
336 were then examined and aligned with coding sequence of *AITRI* obtained from  
337 Phytozome (<http://phytozome.jgi.doe.gov/pz/portal.html>). The primers used for PCR  
338 amplification of *ACT2* and *AITRI* coding sequence and have been described  
339 previously [30,41].

340 To confirm the transgene-free status of the mutants obtained, DNA was isolated

341 from leaves of T2 transgenic plants that have a normal bolting time, and *Cas9* gene  
342 fragment was amplified by PCR. The primers used for PCR amplification of *Cas9*  
343 were, *Cas9-F*, 5'-GGACAACGAGGAGAATGAGG-3', and *Cas9-R*,  
344 5'-TGTCTCGACCAGCTGCCTCTT-3'

345

#### 346 **Bolting time assays**

347 For the T1 plants, the date of bolting was recorded, and days after the transgenic  
348 seedlings were transferred into soil pots were calculated and used as bolting time.  
349 Transferred Col wild type plants were used as controls.

350 For T2 plants, the date of bolting was recorded, and days to bolting after the seeds  
351 were germinated were calculated. Col wild type plants germinated and grown in soil  
352 pots were used as controls.

354 **Author contribution statement**

355 S.W. conceived the study. S.W., Y.C. and N.Z. designed the experiments. Y.C., N.Z.,  
356 S.H., S.A., and W.Y. performed the experiments. S.W., Y.C. and N.Z. analyzed the  
357 data. S.W. drafted the manuscript. All the authors participated in the revision of the  
358 manuscript.

359

360 **Acknowledgement**

361 This work was supported by the National Key R&D Program of China  
362 (2016YFD0101902). The funder has no role in study design, data collection and  
363 analysis, decision to publish, or preparation of the manuscript.

364

365 **Conflict of interest statement**

366 The authors declare no conflict of interest.

368 **References**

- 369 1. Jinek, M.; Chylinski, K.; Fonfara, I.; Hauer, M.; Doudna, J.A.; Charpentier, E. A  
370 programmable dual-RNA-guided DNA endonuclease in adaptive bacterial immunity.  
371 *Science* **2012**, 337, 816-821.
- 372 2. Cong, L.; Ran, F.A.; Cox, D.; Lin, S.; Barretto, R.; Habib, N.; Hsu, P.D.; Wu, X.; Jiang, W.;  
373 Marraffini, L.A.; Zhang, F. Multiplex genome engineering using CRISPR/Cas systems.  
374 *Science* **2013**, 339, 819-823.
- 375 3. Li, J.F.; Norville, J.E.; Aach, J.; McCormack, M.; Zhang, D.; Bush, J.; Church, G.M.;  
376 Sheen, J. Multiplex and homologous recombination-mediated genome editing in  
377 *Arabidopsis* and *Nicotiana benthamiana* using guide RNA and Cas9. *Nat Biotechnol.* **2013**,  
378 31, 688-691.
- 379 4. Nekrasov, V.; Staskawicz, B.; Weigel, D.; Jones, J.D.; Kamoun, S. Targeted mutagenesis  
380 in the model plant *Nicotiana benthamiana* using Cas9 RNA-guided endonuclease. *Nat*  
381 *Biotechnol.* **2013**, 31, 691-693.
- 382 5. Shan, Q.; Wang, Y.; Li, J.; Zhang, Y.; Chen, K.; Liang, Z.; Zhang, K.; Liu, J.; Xi, J.J.; Qiu,  
383 J.L., Gao, C. Targeted genome modification of crop plants using a CRISPR-Cas system.  
384 *Nat Biotechnol.* **2013**, 31, 686-688.
- 385 6. Ma, X.; Zhang, Q.; Zhu, Q.; Liu, W.; Chen, Y.; Qiu, R.; Wang, B.; Yang, Z.; Li, H.; Lin,  
386 Y.; Xie, Y.; Shen, R.; Chen, S.; Wang, Z.; Chen, Y.; Guo, J.; Chen, L.; Zhao, X.; Dong, Z.;  
387 Liu, Y.G. A robust CRISPR/Cas9 system for convenient, high-efficiency multiplex  
388 genome editing in monocot and dicot plants. *Mol Plant* **2015**, 8, 1274-1284.
- 389 7. Gao, X.; Chen, J.; Dai, X.; Zhang, D.; Zhao, Y. An effective strategy for reliably isolating  
390 heritable and Cas9-free *Arabidopsis* mutants generated by RISPR/Cas9-mediated genome  
391 editing. *Plant Physiol.* **2016**, 171, 1794-1800.
- 392 8. Lu, H.P.; Liu, S.M.; Xu, S.L.; Chen, W.Y.; Zhou, X.; Tan, Y.Y.; Huang, J.Z.; Shu, Q.Y.  
393 CRISPR-S: an active interference element for a rapid and inexpensive selection of  
394 genome-edited, transgene-free rice plants. *Plant Biotechnol J.* **2017**, 15, 1371-1373.
- 395 9. Shimatani, Z.; Kashojiya, S.; Takayama, M.; Terada, R.; Arazoe, T.; Ishii, H.; Teramura,  
396 H.; Yamamoto, T.; Komatsu, H.; Miura, K.; Ezura, H.; Nishida, K.; Ariizumi, T.; Kondo,

- 397 A. Targeted base editing in rice and tomato using a CRISPR-Cas9 cytidine deaminase  
398 fusion. *Nat Biotechnol.* **2017**, 35, 441-443.
- 399 10. He, Y.; Zhu, M.; Wang, L.; Wu, J.; Wang, Q.; Wang, R.; Zhao, Y. Programmed  
400 Self-Elimination of the CRISPR/Cas9 Construct Greatly Accelerates the Isolation of  
401 Edited and Transgene-Free Rice Plants. *Mol Plant* **2018**, 11, 1210-1213.
- 402 11. Zsögön, A.; Čermák, T.; Naves, E.R.; Notini, M.M.; Edel, K.H.; Weinl, S.; Freschi, L.;  
403 Voytas, D.F.; Kudla, J.; Peres, L.E.P. De novo domestication of wild tomato using  
404 genome editing. *Nat Biotechnol.* **2018**, 36, 1211-1216.
- 405 12. Chen, K.; Wang, Y.; Zhang, R.; Zhang, H.; Gao, C. CRISPR/Cas Genome Editing and  
406 Precision Plant Breeding in Agriculture. *Annu Rev Plant Biol.* **2019**, doi:  
407 10.1146/annurev-arplant-050718-100049.
- 408 13. Hu, J.H.; Miller, S.M.; Geurts, M.H.; Tang, W.; Chen, L.; Sun, N.; Zeina, C.M.; Gao, X.;  
409 Rees, H.A.; Lin, Z.; Liu, D.R. Evolved Cas9 variants with broad PAM compatibility and  
410 high DNA specificity. *Nature* **2018**, 556, 57-63.
- 411 14. Nishimasu, H.; Shi, X.; Ishiguro, S.; Gao, L.; Hirano, S.; Okazaki, S.; Noda, T.;  
412 Abudayyeh, O.O.; Gootenberg, J.S.; Mori, H.; Oura, S.; Holmes, B.; Tanaka, M.; Seki, M.;  
413 Hirano, H.; Aburatani, H.; Ishitani, R.; Ikawa, M.; Yachie, N.; Zhang, F.; Nureki, O.  
414 Engineered CRISPR-Cas9 nuclease with expanded targeting space. *Science* **2018**,  
415 361,1259-1262.
- 416 15. Jung, C.; Muller, A.E. Flowering time control and applications in plant breeding. *Trends*  
417 *Plant Sci.* **2009**, 14, 563-573.
- 418 16. Boss, P.K.; Bastow, R.M.; Mylne, J.S.; Dean, C. Multiple pathways in the decision to  
419 flower: enabling, promoting, and resetting. *Plant Cell* **2004**, 16, S18-S31.
- 420 17. Yant, L.; athieu, J. ; Schmid, M. Just say no: floral repressors help Arabidopsis bide the  
421 time. *Curr Opin Plant Biol.* **2009**, 12, 580-586.
- 422 18. Wahl, V.; Ponnu, J.; Schlereth, A.; Arrivault, S.; Langenecker, T.; Franke, A.; Feil, R.;  
423 Lunn, J.E.; Stitt, M.; Schmid, M. Regulation of flowering by trehalose-6-phosphate  
424 signaling in Arabidopsis thaliana. *Science* **2013**, 339, 704-707.
- 425 19. Gendall, A.R.; Levy, Y.Y.; Wilson, A.; Dean, C. The VERNALIZATION 2 gene  
426 mediates the epigenetic regulation of vernalization in Arabidopsis. *Cell* **2001**, 107,

- 427 525-535
- 428 20. Ratcliffe, O.J.; Kumimoto, R.W.; Wong, B.J.; Riechmann, J.L. Analysis of the  
429 Arabidopsis MADS AFFECTING FLOWERING gene family: MAF2 prevents  
430 vernalization by short periods of cold. *Plant Cell* **2003**, 15, 1159-1169.
- 431 21. Mockler, T.C.; Yu, X.H.; Shalitin, D.; Parikh, D.; Michael, T.P.; Liou, J.; Huang, J.;  
432 Smith, Z.; Alonso, J.M.; Ecker, J.R.; Chory, J.; Lin, C. Regulation of flowering time in  
433 Arabidopsis by K homology domain proteins. *Proc Natl Acad Sci USA* **2004**, 101,  
434 12759-12764.
- 435 22. Tamada, Y.; Yun, J.Y.; Woo, S.C.; Amasino, R.M. ARABIDOPSIS  
436 TRITHORAX-RELATED7 is required for methylation of lysine 4 of histone H3 and for  
437 transcriptional activation of FLOWERING LOCUS C. *Plant Cell* **2009**, 21, 3257-3269.
- 438 23. Wang, J.W.; Czech, B.; Weigel, D. miR156-regulated SPL transcription factors define an  
439 endogenous flowering pathway in Arabidopsis thaliana. *Cell* 2009, 138, 738-749.
- 440 24. Jung, J.H.; Seo, P.J.; Ahn, J.H.; Park, C.M. Arabidopsis RNA-binding protein FCA  
441 regulates microRNA172 processing in thermosensory flowering. *J Biol Chem.* **2012**, 287,  
442 16007-16016
- 443 25. Tamaki, S.; Matsuo, S.; Wong, H.L.; Yokoi, S.; Shimamoto, K. Hd3a protein is a mobile  
444 flowering signal in rice. *Science* **2007**, 316, 1033-1036.
- 445 26. Kong, F.; Liu, B.; Xia, Z.; Sato, S.; Kim, B.M.; Watanabe, S.; Yamada, T.; Tabata, S.;  
446 Kanazawa, A.; Harada, K.; Abe, J. Two coordinately regulated homologs of  
447 FLOWERING LOCUS T are involved in the control of photoperiodic flowering in  
448 soybean. *Plant Physiol.* **2010**, 154, 1220-1231.
- 449 27. Putterill, J.; Varkonyi-Gasic, E. FT and florigen long-distance flowering control in plants.  
450 *Curr Opin Plant Biol* **2016**, 33, 77-82.
- 451 28. Wickland, D.P.; Hanzawa, Y. The FLOWERING LOCUS T/TERMINAL FLOWER 1  
452 gene family: functional evolution and molecular mechanisms. *Mol Plant* **2015**, 8,  
453 983-997.
- 454 29. Bull, S.E.; Seung, D.; Chanez, C.; Mehta, D.; Kuon, J.E.; Truernit, E.; Hochmuth, A.;  
455 Zurkirchen, I.; Zeeman, S.C.; Gruissem, W.; Vanderschuren, H. Accelerated ex situ  
456 breeding of GBSS- and PTST1-edited cassava for modified starch. *Sci Adv.* **2018**, 4,

- 457 eaat6086.
- 458 30. Tian, H.; Chen, S.; Yang, W.; Wang, T.; Zheng, K.; Wang, Y.; Cheng, Y.; Zhang, N.; Liu,  
459 S.; Li, D.; Liu, B.; Wang, S. A novel family of transcription factors conserved in  
460 angiosperms is required for ABA signalling. *Plant Cell Environ.* **2017**, 40, 2958-2971.
- 461 31. Sun, H.; Jia, Z.; Cao, D.; Jiang, B.; Wu, C.; Hou, W.; Liu, Y.; Fei, Z.; Zhao, D.; Han, T.  
462 GmFT2a, a soybean homolog of FLOWERING LOCUS T, is involved in flowering  
463 transition and maintenance. *PLoS One* **2011**, 6, e29238.
- 464 32. Nan, H.; Cao, D.; Zhang, D.; Li, Y.; Lu, S.; Tang, L.; Yuan, X.; Liu, B.; Kong, F.  
465 GmFT2a and GmFT5a redundantly and differentially regulate flowering through  
466 interaction with and upregulation of the bZIP transcription factor GmFDL19 in soybean.  
467 *PLoS One* **2014**, 9, e97669.
- 468 33. Wang, Z.; Xing, H.; Dong, L.; Zhang, H.; Han, C.; Wang, X.; Chen, Q. Egg cell-specific  
469 promoter-controlled CRISPR/Cas9 efficiently generates homozygous mutants for multiple  
470 target genes in Arabidopsis in a single generation. *Genome Biol.* **2015**, 16,144.
- 471 34. Putterill, J.; Zhang, L.; Yeoh, C.; Balcerowicz, M.; Jaudal, M.; Varkonyi Gasic, E. FT  
472 genes and regulation of flowering in the legume *Medicago truncatula*. *Funct Plant Biol.*  
473 **2013**. 40, 1199-1207
- 474 35. Yamagishi, N.; Kishigami, R.; Yoshikawa, N. Reduced generation time of apple seedlings  
475 to within a year by means of a plant virus vector: a new plant-breeding technique with no  
476 transmission of genetic modification to the next generation. *Plant Biotechnol J.* **2014**, 12,  
477 60-68.
- 478 36. Yamagishi, N.; Li, C.; Yoshikawa, N. Promotion of flowering by Apple latent spherical  
479 virus vector and virus elimination at high temperature allow accelerated breeding of apple  
480 and pear. *Front Plant Sci.* **2016**, 7, 171.
- 481 37. Tian, H.; Guo, H.; Dai, X.; Cheng, Y.; Zheng, K.; Wang, X.; Wang, S. An ABA  
482 down-regulated bHLH transcription repressor gene, bHLH129 regulates root elongation  
483 and ABA response when overexpressed in Arabidopsis. *Scic Rep.* **2015**, 5, 17587.
- 484 38. Dai, X.; Zhou, L.; Zhang, W.; Cai, L.; Guo, H.; Tian, H.; Schiefelbein, J.; Wang, S. A  
485 single amino acid substitution in the R3 domain of GLABRA1 leads to inhibition of  
486 trichome formation in Arabidopsis without affecting its interaction with GLABRA3. *Plant*

- 487        *Cell Environ.* **2016**, 39, 897-907.
- 488    39. Wang, S.; Tiwari, S.B.; Hagen, G.; Guilfoyle, T.J. AUXIN RESPONSE FACTOR7  
489        restores the expression of auxin-responsive genes in mutant Arabidopsis leaf mesophyll  
490        protoplasts. *Plant Cell* **2005**, 17, 1979-1993.
- 491    40. Clough, S.J.; Bent, A.F. Floral dip: a simplified method for Agrobacterium-mediated  
492        transformation of Arabidopsis thaliana. *Plant J.* **1998**, 16, 735-743.
- 493    41. Guo, H.; Zhang, W.; Tian, H.; Zheng, K.; Dai, X.; Liu, S.; Hu, Q.; Wang, X.; Liu, B.;  
494        Wang, S. An auxin responsive CLE gene regulates shoot apical meristem development in  
495        Arabidopsis. *Front Plant Sci.* **2015**, 6, 295.
- 496



498 **Figure legends**

499 **Figure 1. Generation of a *FT* expression cassette containing *pHEE* CRISPR/Cas9**  
500 **construct for *AITRI* editing.**

501 (a) *pHEE* vector with a *FT* expression cassette. The full-length ORF sequence of  
502 *GmFT2a* was synthesized, and cloned into *pUC19* vector under the control of the *35S*  
503 promoter and terminated by the *nos* sequence. The *35S:GmFT2a-nos* cassette was  
504 amplified by PCR and then inserted into the *pHEE* vector at the *PmeI* site by using  
505 Gibson assembly to generate *pHEE-FT* vector. (b) The *sgRNA* expression cassettes in  
506 the *pHEE-FT-AITRI* construct. The *sgRNA* sequences corresponding to the target  
507 sequences of *AITRI* were introduced into the *sgRNA* expression cassettes by PCR  
508 amplification, followed by Golden Gate reaction with the *pHEE-FT* vector. (c) Target  
509 sequences in *AITRI*. Numbers indicated the nucleotide position relative to the first  
510 nucleotide in the coding sequence of *AITRI*, PAM sites after the target sequences  
511 were indicated in the brackets.

512

513 **Figure 2. Early bolting phenotypes observed in the T1 transgenic plants.**

514 (a) Early bolting phenotype in some T1 transgenic plants. Transgenic plants were  
515 selected on antibiotic-containing 1/2 MS plates, and ~5-day-old transgenic seedlings  
516 were transferred into soil pots and grown in a growth room. As a control, seeds of Col  
517 wild type were germinated on 1/2 MS plates, and seedlings ~5-day-old were  
518 transferred into soil pots. Pictures were taken 10 days after the transfer. (b) Bolting  
519 time of the T1 transgenic plants. The date of bolting for the plants was recorded, and

520 days after the transfer were calculated. For Col wild type plants, n=11. For transgenic  
521 plants, n=53.

522

523 **Figure 3. *AITRI* editing status in T1 transgenic plants.**

524 (a) PCR amplification of *AITRI* coding sequence in the T1 transgenic plants. DNA  
525 was isolated from leaves collected from individual T1 transgenic plants, and PCR was  
526 used to amplify coding sequence of *AITRI*. Picture is representative image of PCR  
527 results, showing the 1 or 2 PCR product bands obtained in different plants. (b) *AITRI*  
528 editing status in 21 individual T1 transgenic plants. PCR products were recovered  
529 from gel and sequenced. Sequencing results were examined and aligned with coding  
530 sequence of *AITRI* to check the editing status in the T1 transgenic plants. -, not edited,  
531 -/+, edited but heterozygous, ins, homozygous or biallelic editing with nucleotide  
532 insertions as indicated, N/A, not sequenced.

533

534 **Figure 4. Phenotype segregation in the T2 generation of selected transgenic lines.**

535 (a) Bolting phenotype of the T2 plants from a single T1 transgenic line. T2 seeds were  
536 collected from selected T1 transgenic lines and sown directly into soil pots and grown  
537 in a growth room. Col wild type plants were generated and grown side by side with  
538 the T2 plants as a control. Pictures were taken 17 days after germination. Arrows  
539 indicate plants that were not bolting early. (b) Bolting phenotype segregation of the  
540 T2 plants from selected T1 transgenic lines. Chi square analysis was performed on  
541 omni calculator (<https://www.omnicalculator.com/statistics/chi-square>).

542

543 **Figure 5. T2 plants with normal bolting time are transgene-free plants.**

544 DNA was isolated from leaves collected from six individual T2 plants with normal  
545 bolting time, and PCR was used to amplify *Cas9* fragment. For each line, DNA was  
546 also isolated from two early bolting plants, and used a positive control for *Cas9*  
547 amplification. PCR amplification of *ACT2* was used as a control.

548

549 **Figure 6. Isolation of genome edited transgene-free *aitr1* mutants.**

550 Transgene-free *aitr1* mutants isolated from line 14 (a) and line 15 (b). DNA was  
551 isolated from leaves collected from individual T2 plants with normal bolting time, and  
552 used as template to amplify the coding sequence of *AITR1*. The PCR products were  
553 recovered from gel and sequenced. Sequencing results were compared with coding  
554 sequence of *AITR1* to check the editing status. ORF of the *AITR1* sequences in the  
555 *aitr1* mutants were identified on ORFfinder (<https://www.ncbi.nlm.nih.gov/orffinder/>),  
556 and corresponding amino acid sequences were used for alignment with AITR1 amino  
557 acid sequences. Triangle indicates fragment deletion, arrow indicates nucleotide  
558 insertion, underlines in the sequence results indicate the PAM sites. Numbers in the  
559 alignment indicate the position of amino acid relative to the first Met of AITR1.

560

561 **Figure 7. Simplified procedure for generating genome edited transgene-free**  
562 **mutants by using *FT* expression cassette-containing CRISPR/Cas9 construct.**

563 Plants can be transformed and transgenic plants can selected in a way similar to that

564 for other constructs. Within the T1 transgenic plants, select plants with early-bolting  
565 phenotype, and sequence to examine genome editing status. Keep only genome edited  
566 plants. In the T2 plants germinated from seeds of the individual T1 plants, keep only  
567 these bolting normally, and sequence to identify genome edited plants. These plants  
568 are genome edited transgene-free mutants. If necessary, confirm the transgene-free  
569 status by PCR amplification of *Cas9* fragment.

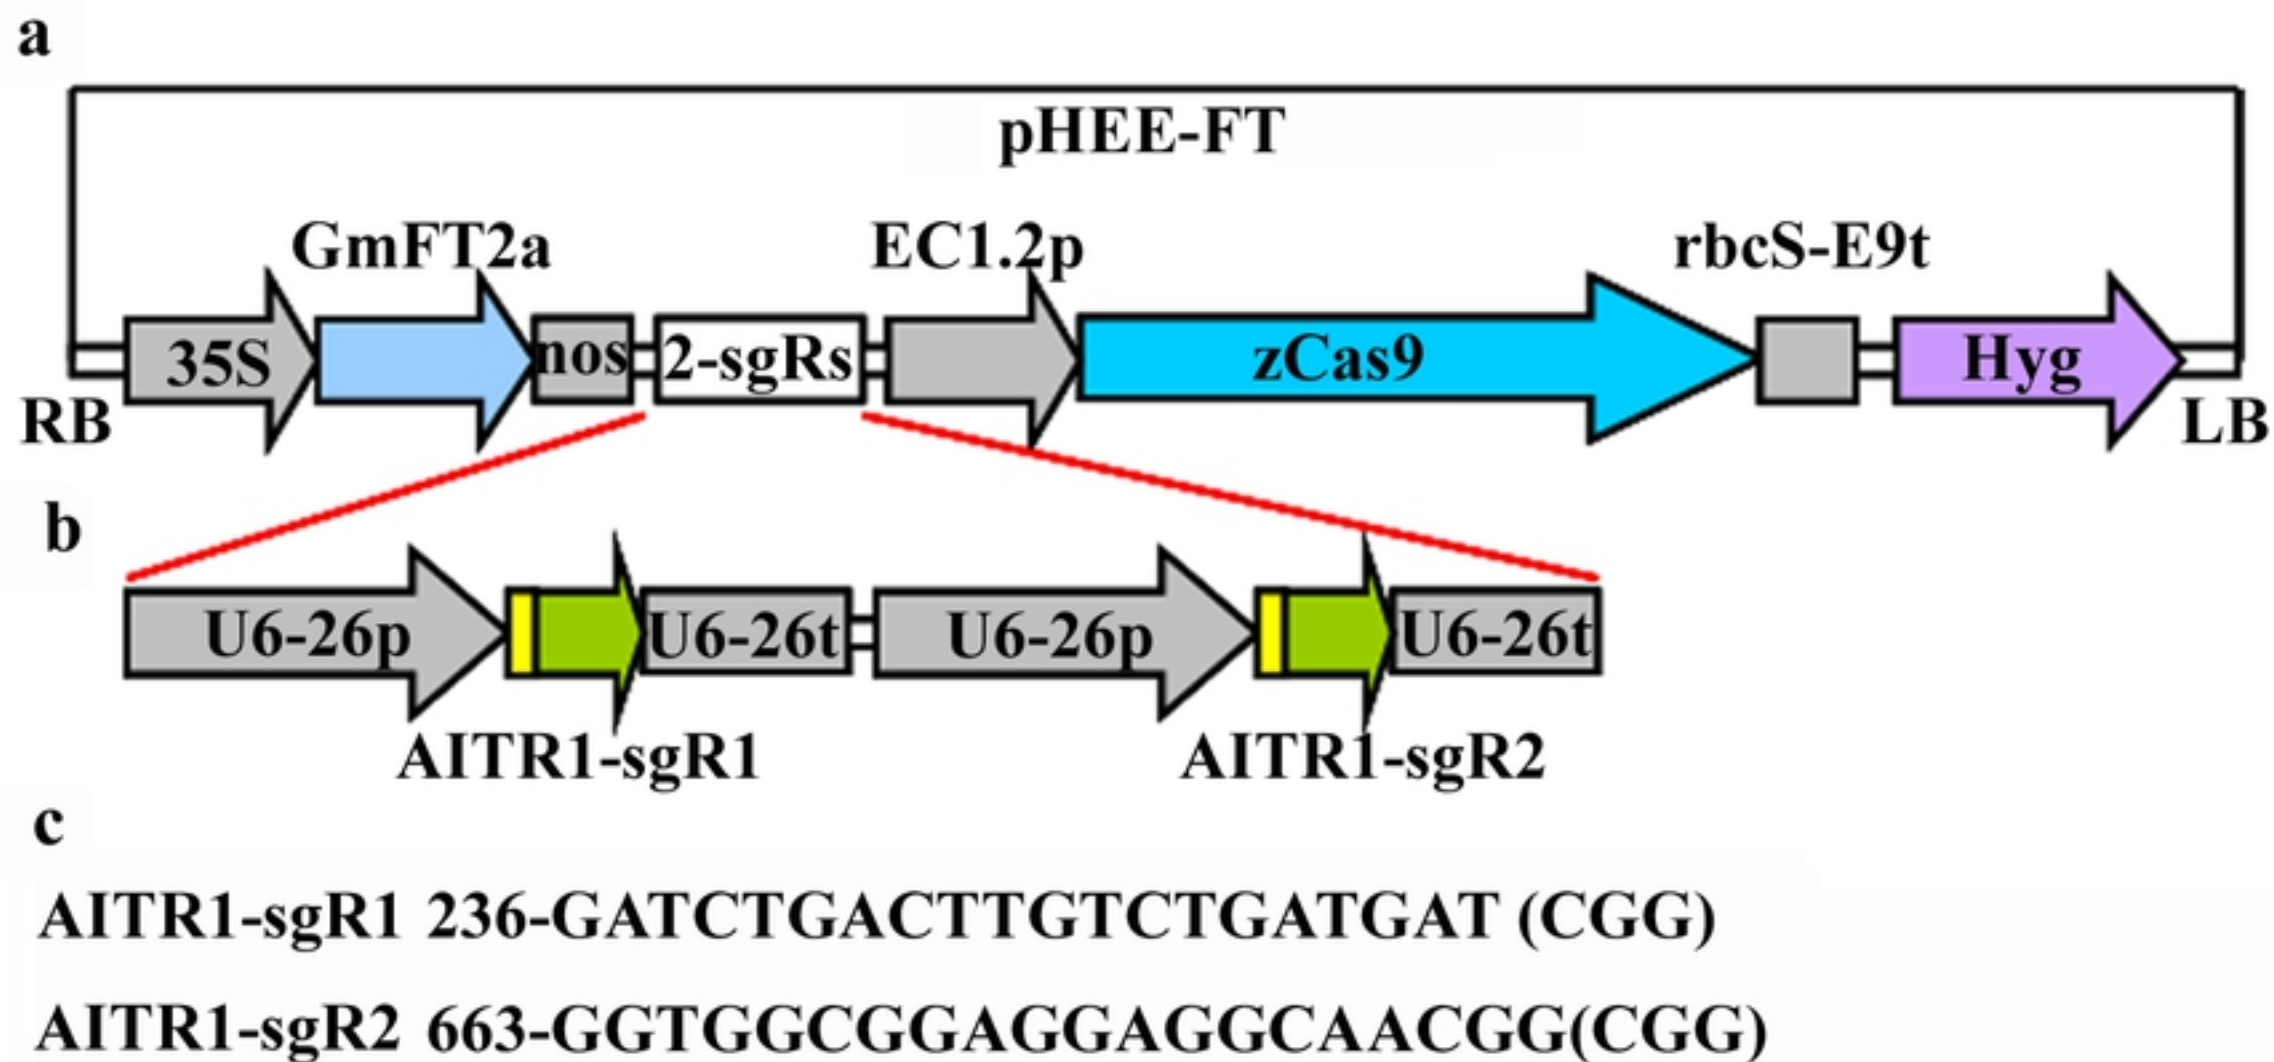

Figure 1

**a**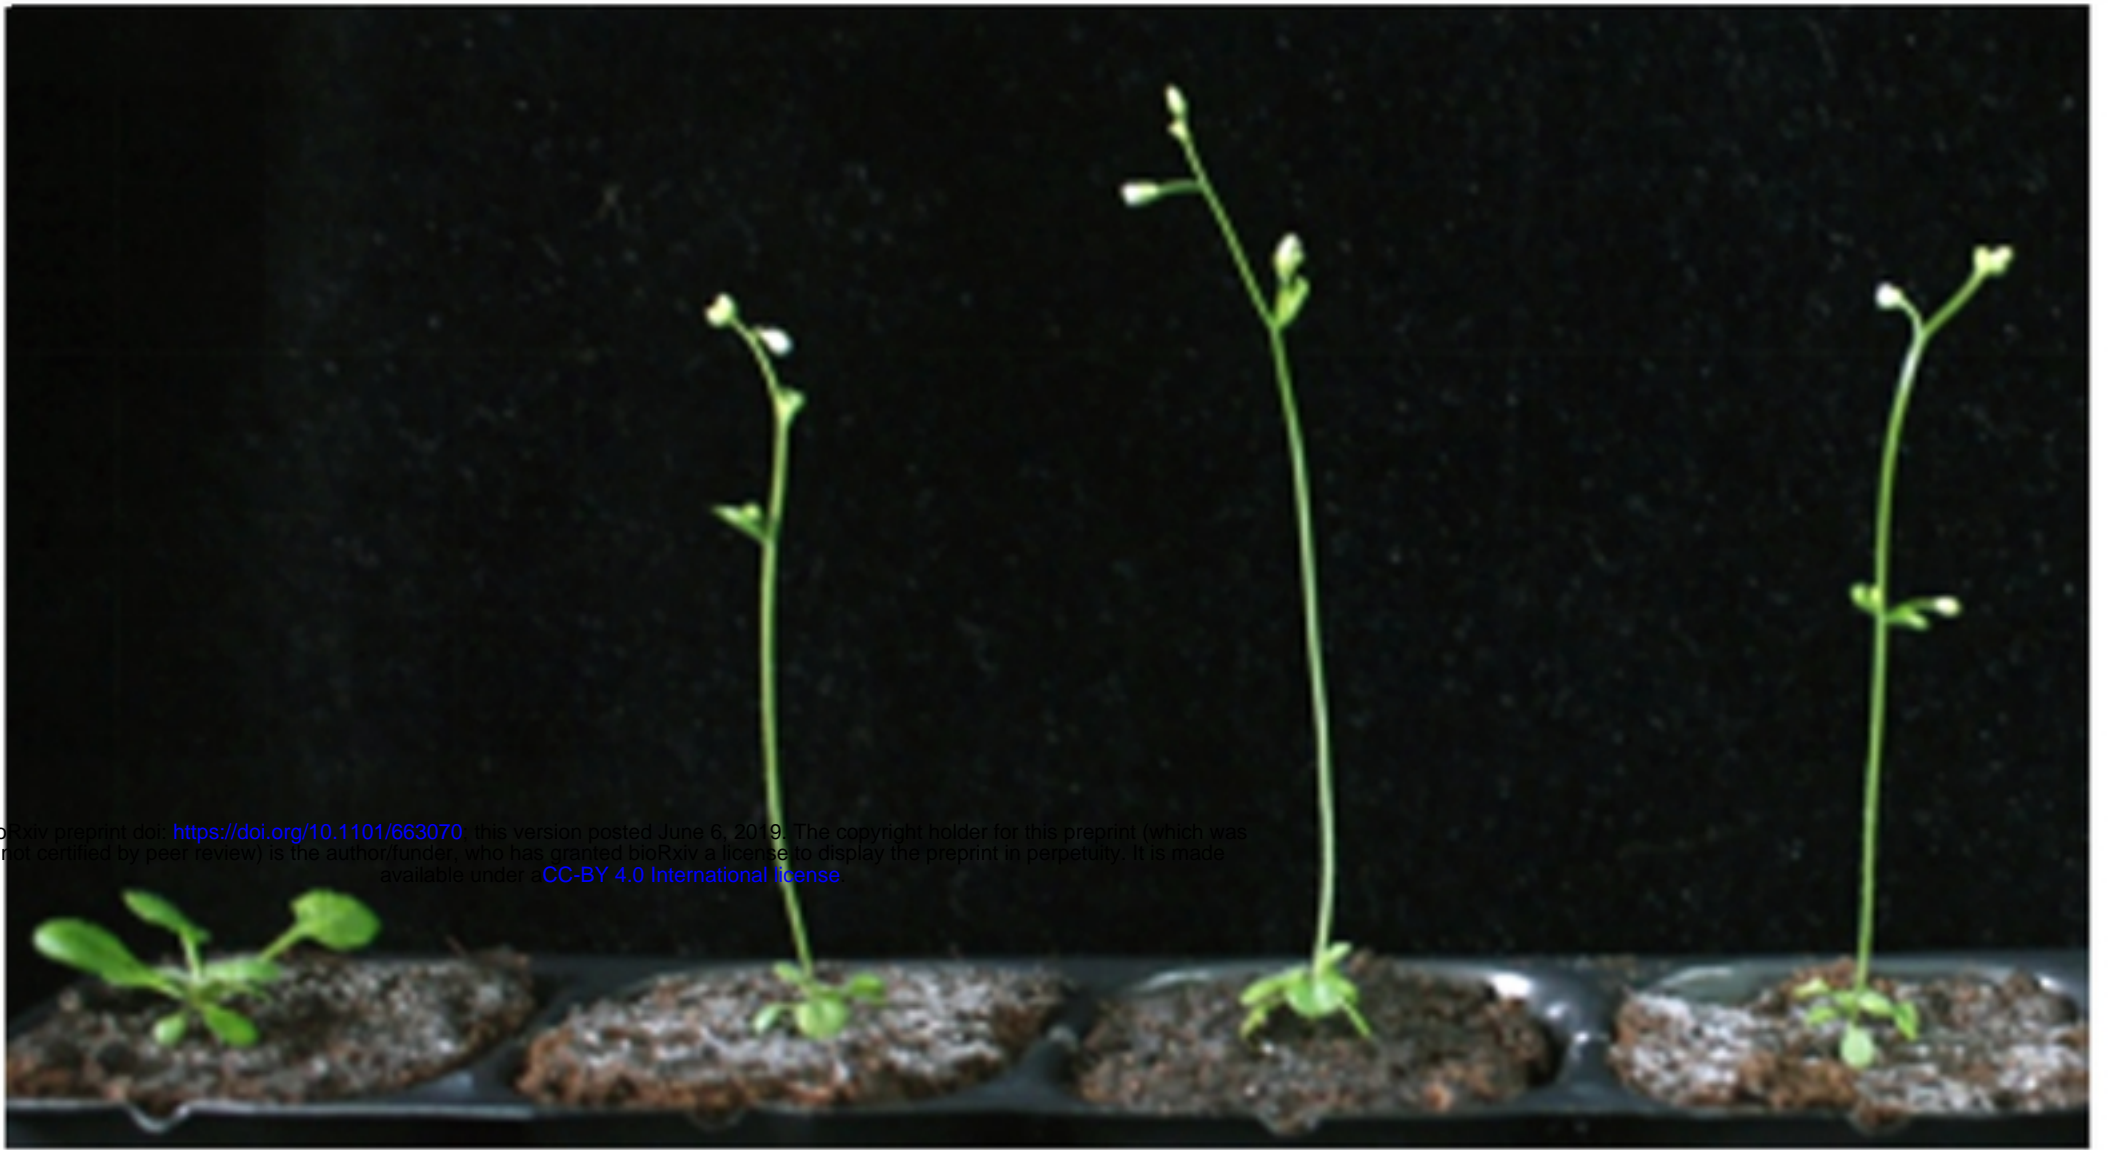**Col****T1****b**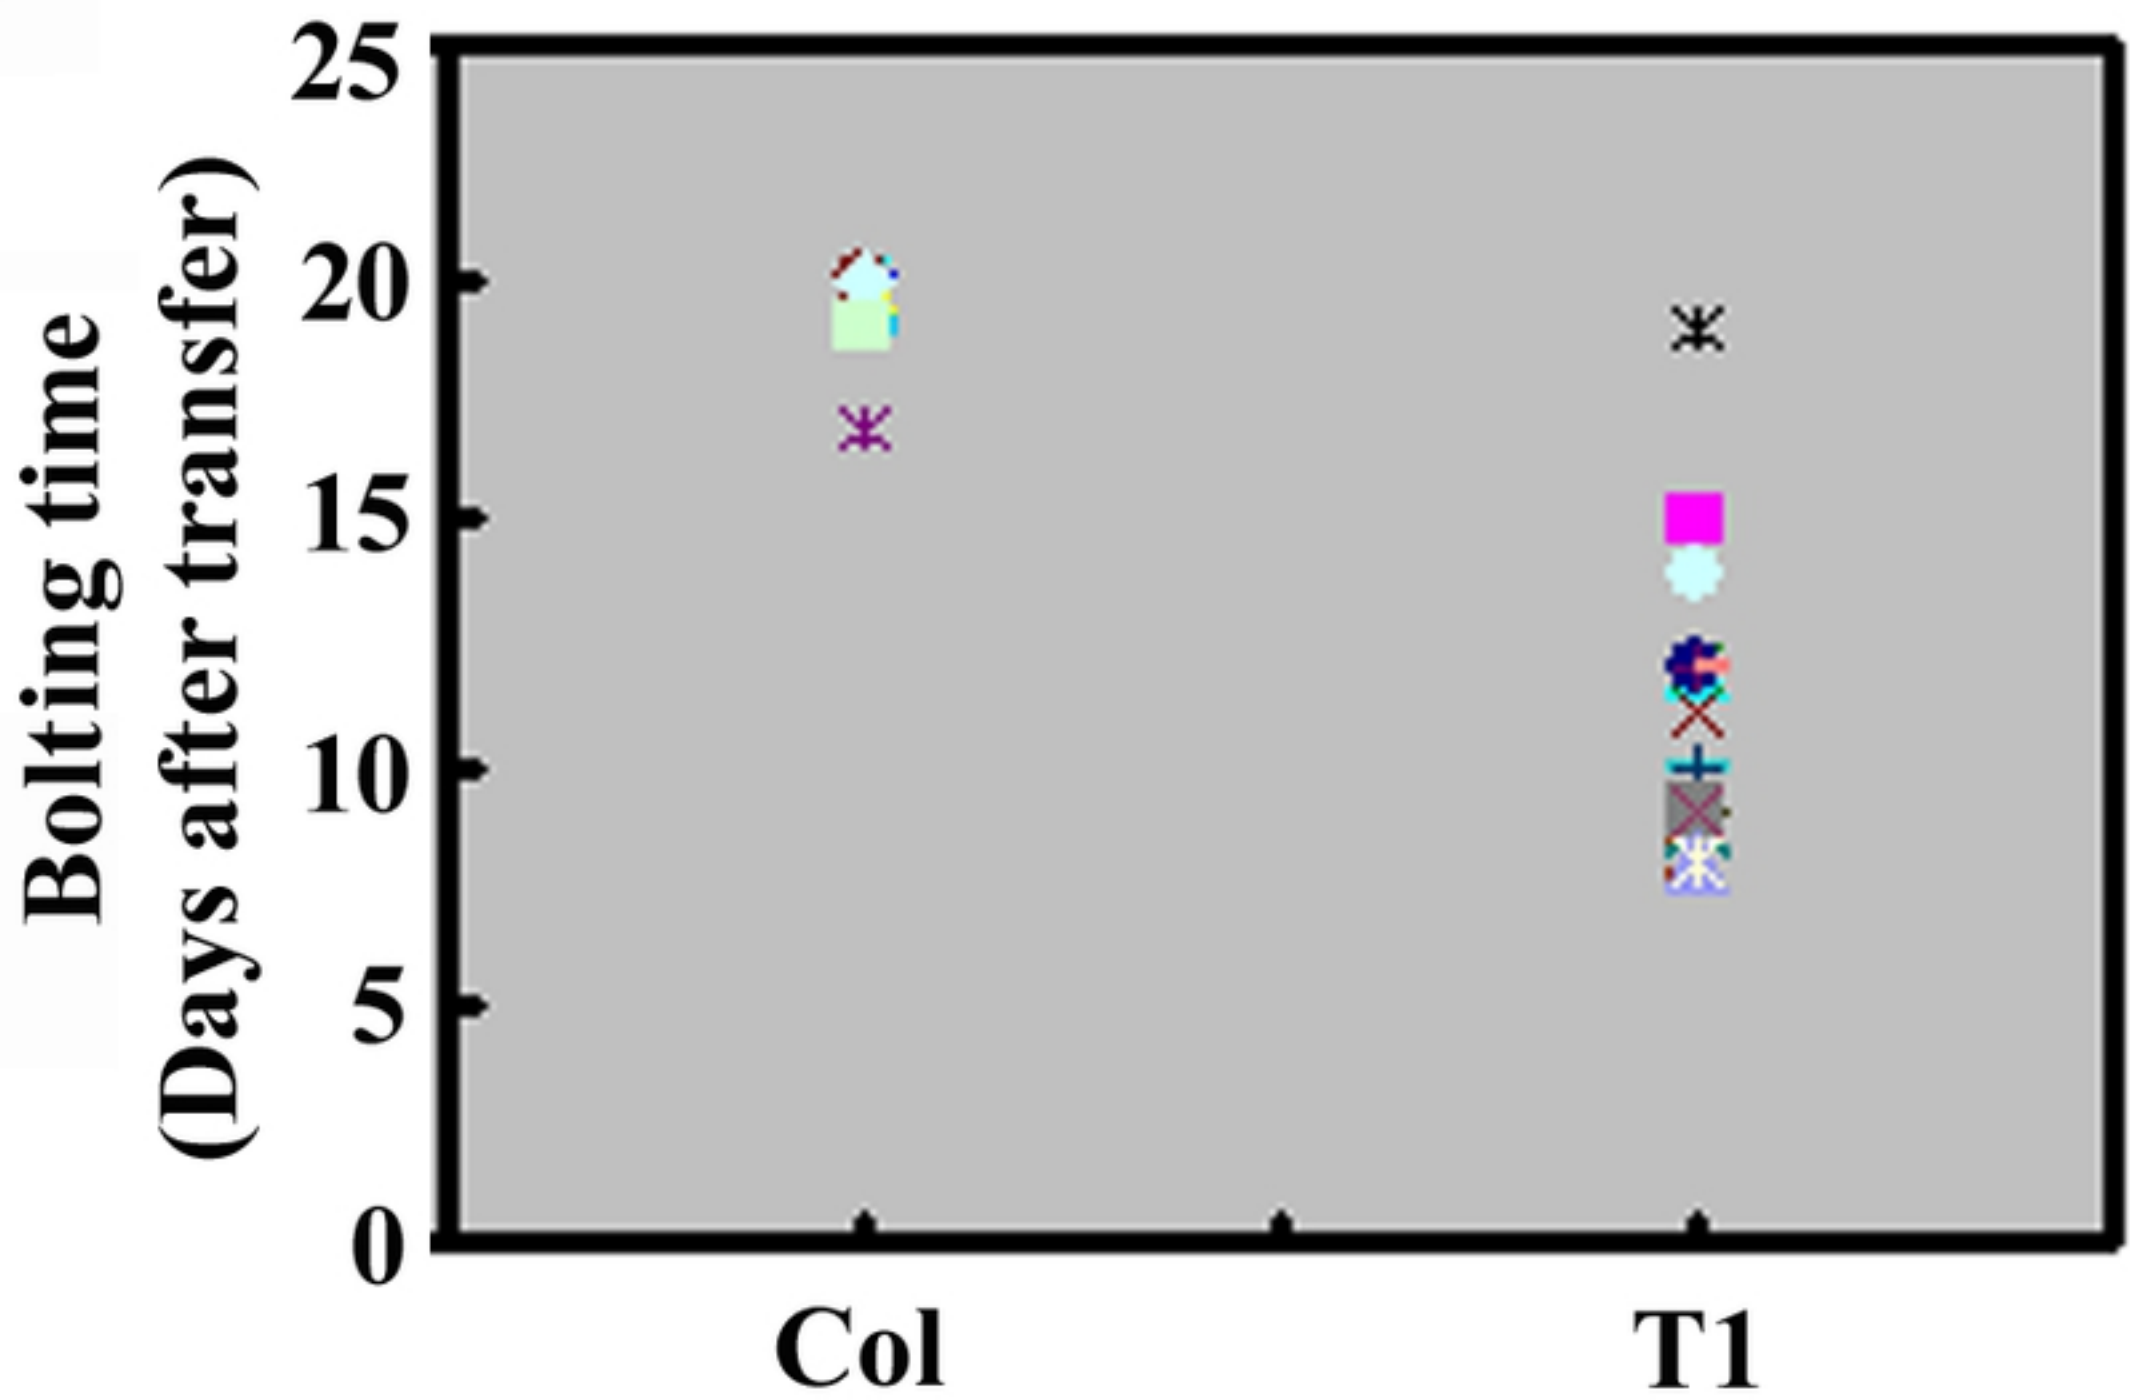

Figure 2

**a**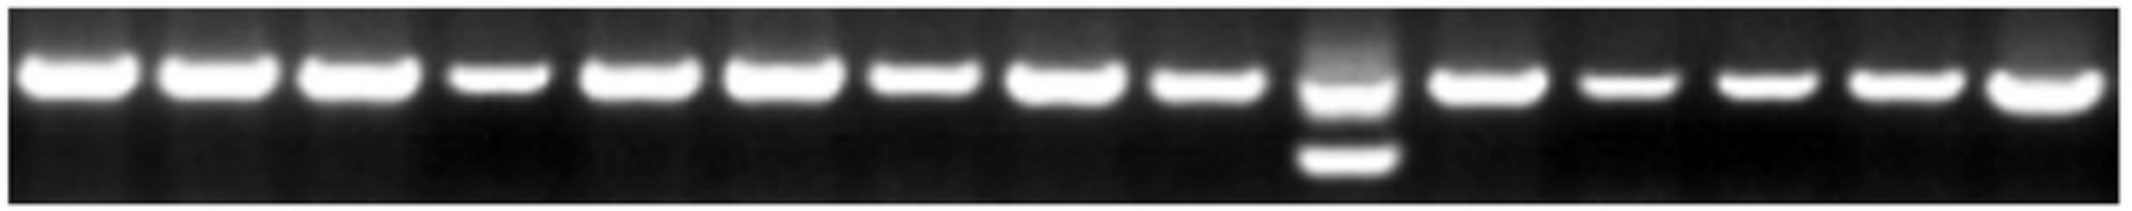**b*****AITR1* editing status in T1 plants**

| Lines | PCR bands | sgR1 | sgR2    | Bolting |
|-------|-----------|------|---------|---------|
| 1     | 1         | -    | -/+     | early   |
| 2     | 1         | -/+  | -       | early   |
| 3     | 1         | -    | -       | early   |
| 4     | 1         | -    | -       | early   |
| 5     | 1         | -    | -/+     | early   |
| 6     | 1         | -    | -/+     | early   |
| 9     | 1         | -    | -/+     | early   |
| 10    | 1         | -    | -       | early   |
| 11    | 1         | -    | A ins   | early   |
| 12    | 1         | -    | -/+     | early   |
| 13    | 1         | -    | -       | early   |
| 14    | 2         | N/A  | N/A     | early   |
| 15    | 1         | -    | A ins   | early   |
| 57    | 1         | -    | -/+     | early   |
| 58    | 1         | -    | -/+     | early   |
| 59    | 2         | N/A  | N/A     | medium  |
| 60    | 1         | -    | -/+     | early   |
| I7    | 1         | -    | A/T ins | normal  |
| J7    | 1         | -    | -       | normal  |

bioRxiv preprint doi: <https://doi.org/10.1101/663070>; this version posted June 6, 2019. The copyright holder for this preprint (which was not certified by peer review) is the author/funder, who has granted bioRxiv a license to display the preprint in perpetuity. It is made available under aCC-BY 4.0 International license.

Figure 3

**a**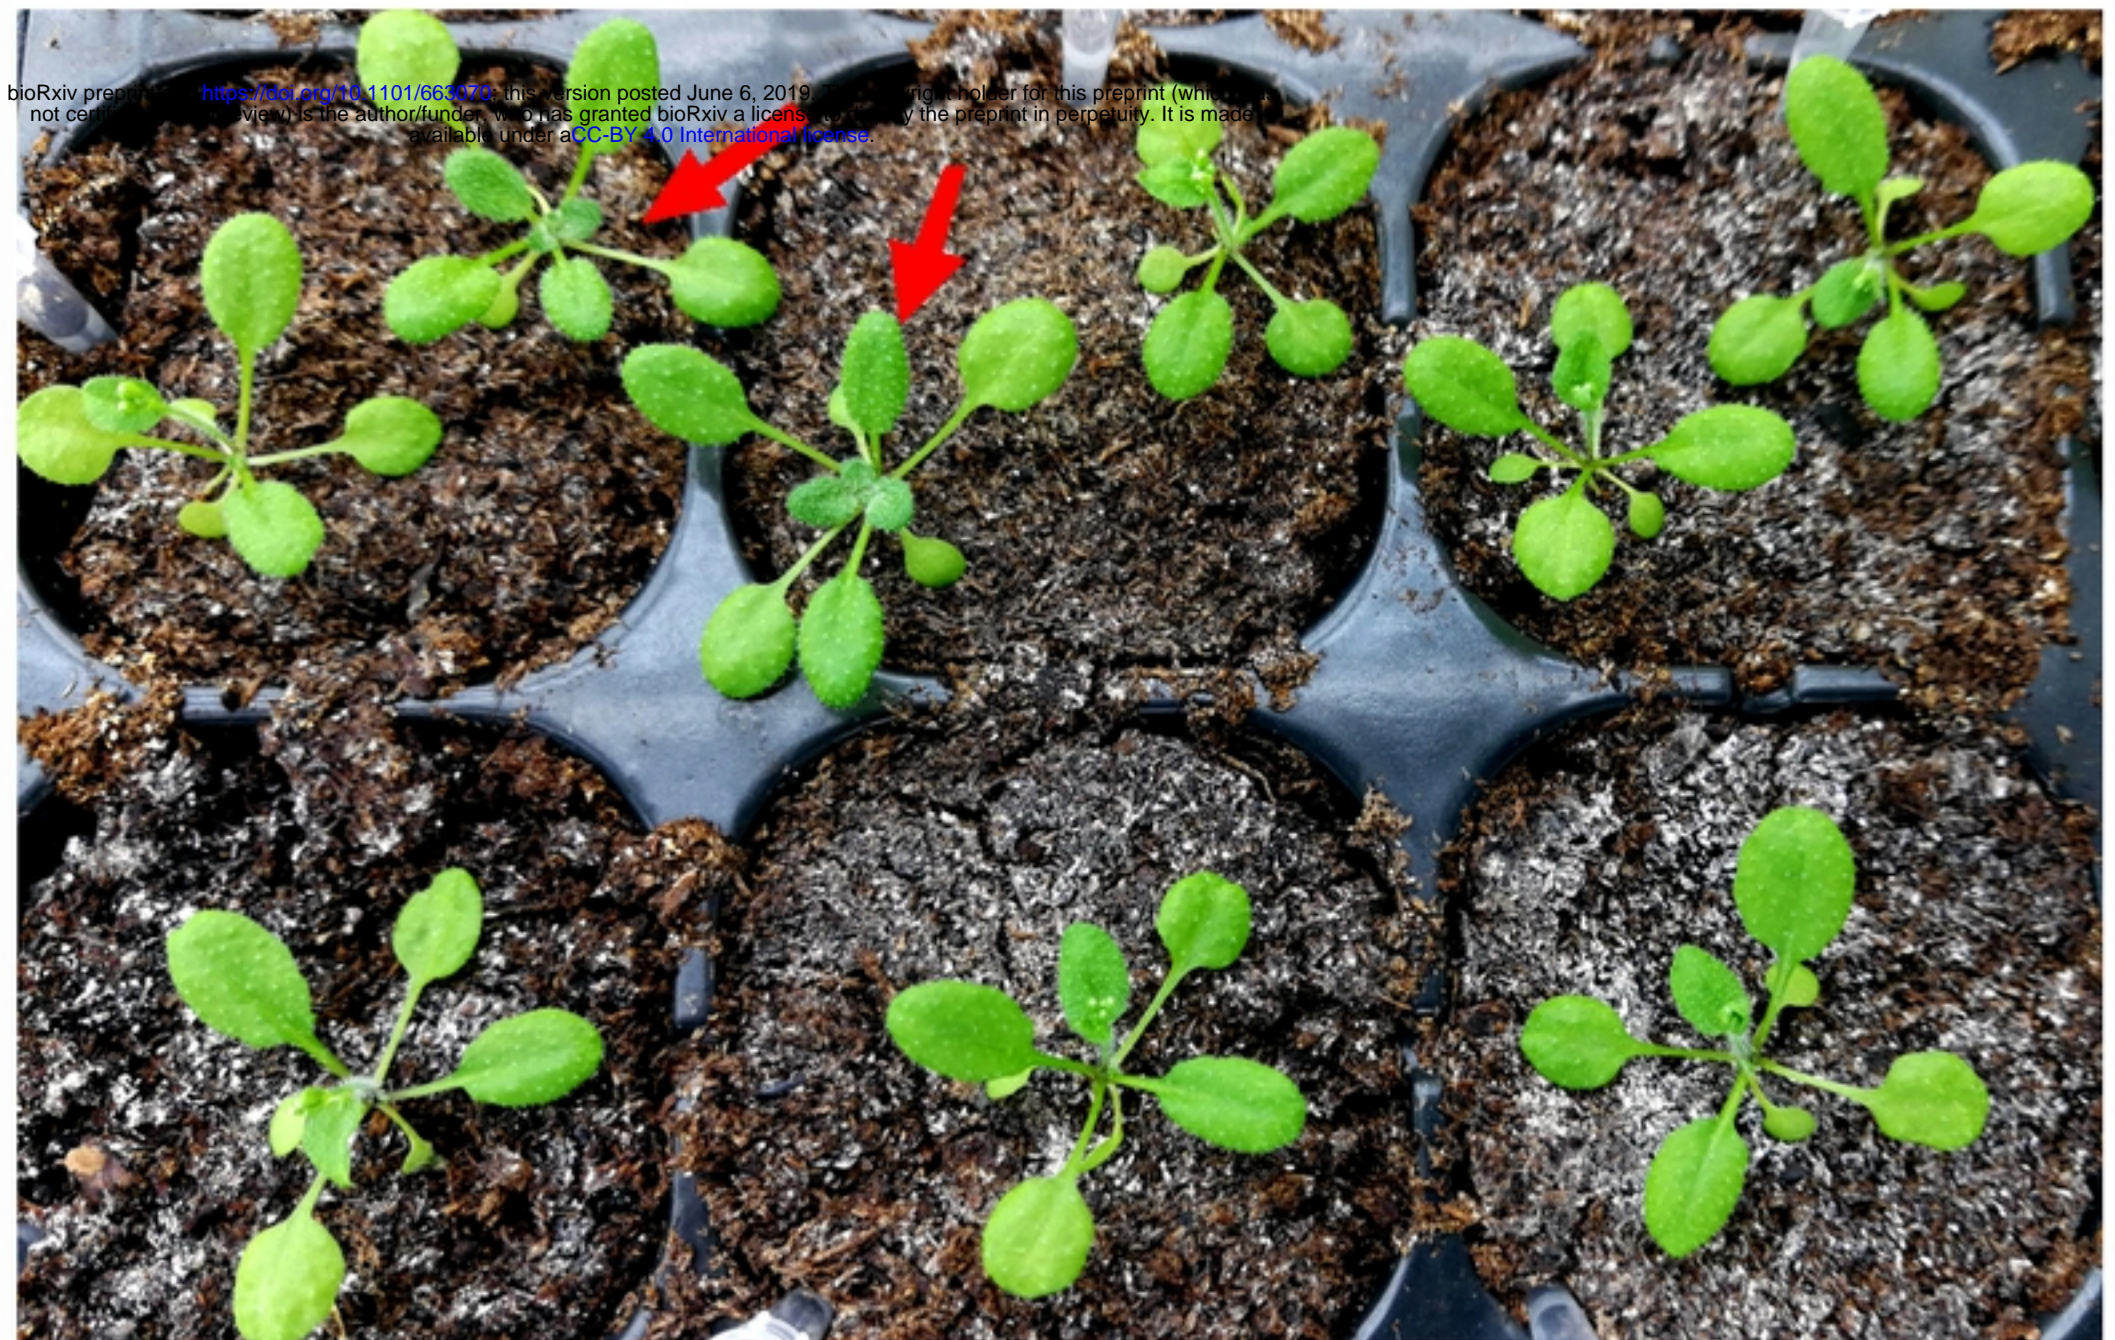**b**

## Segregation of bolting phenotype in T2 plants

| Lines | Bolting early | Bolting normal | $\chi^2$ for 3:1 |
|-------|---------------|----------------|------------------|
| 14    | 40            | 14             | 0.007            |
| 15    | 39            | 9              | 0.593            |

Figure 4



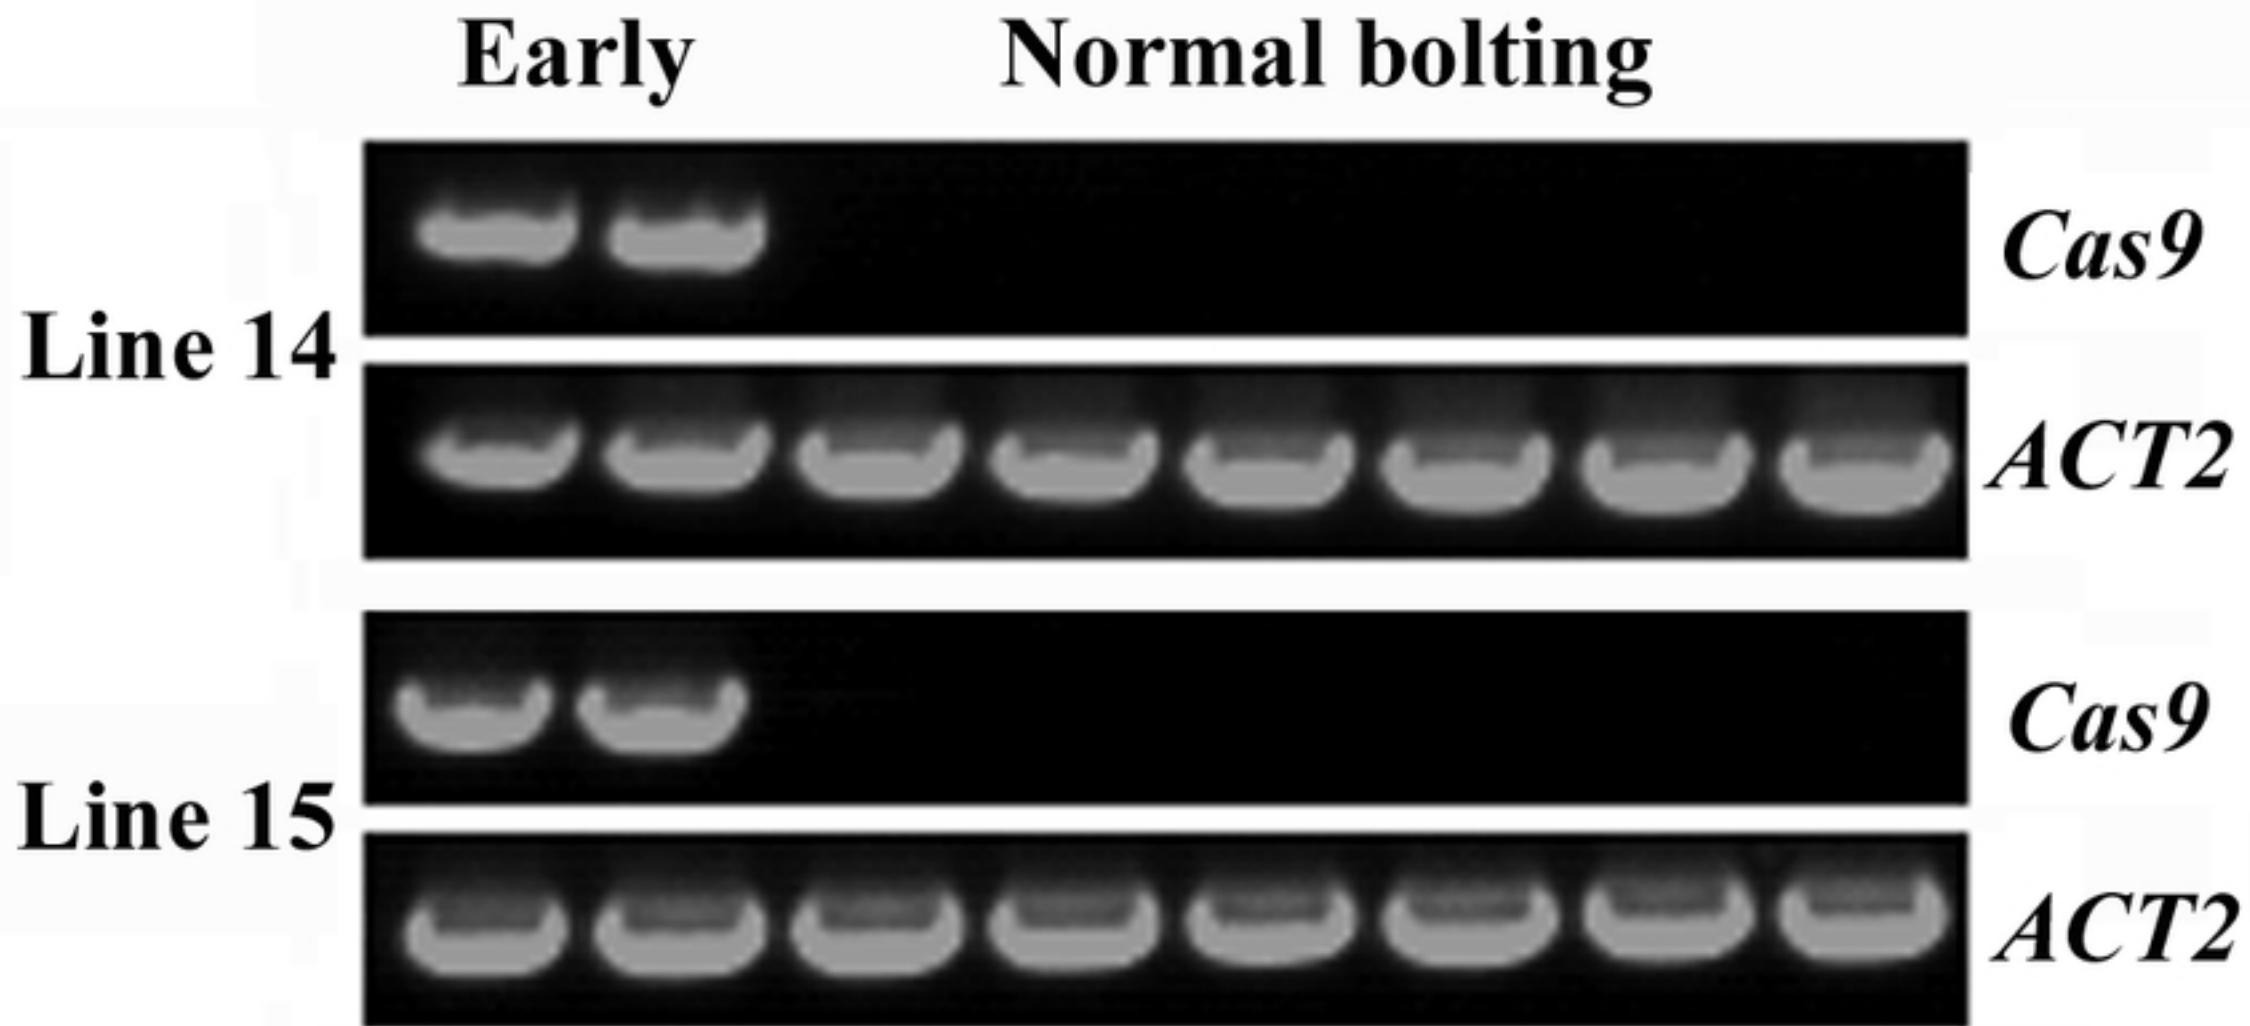

Figure 5

**a**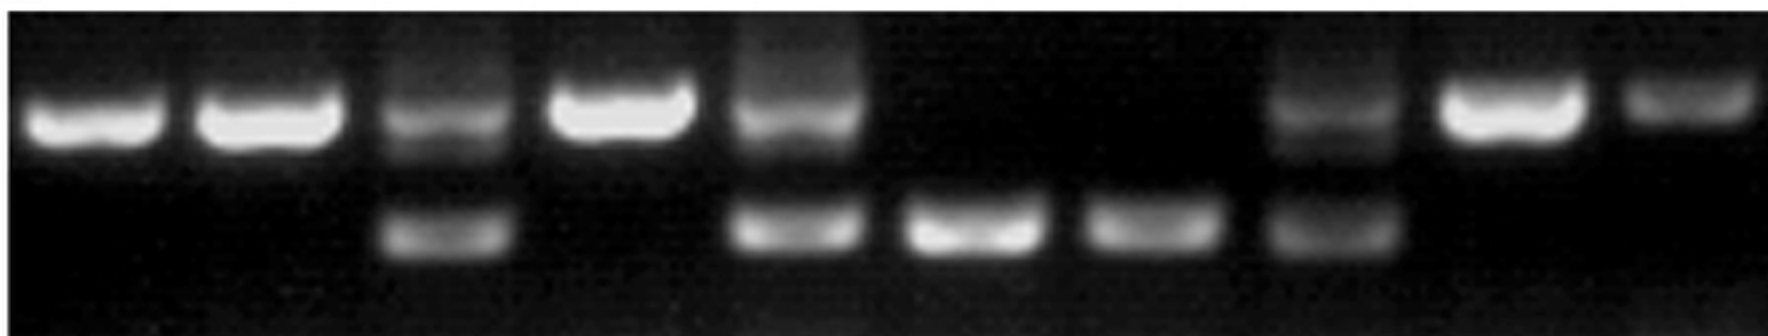*AITR1***428bp del**

T G A C T T G T C T G A T G G C G G C G A T G C A T

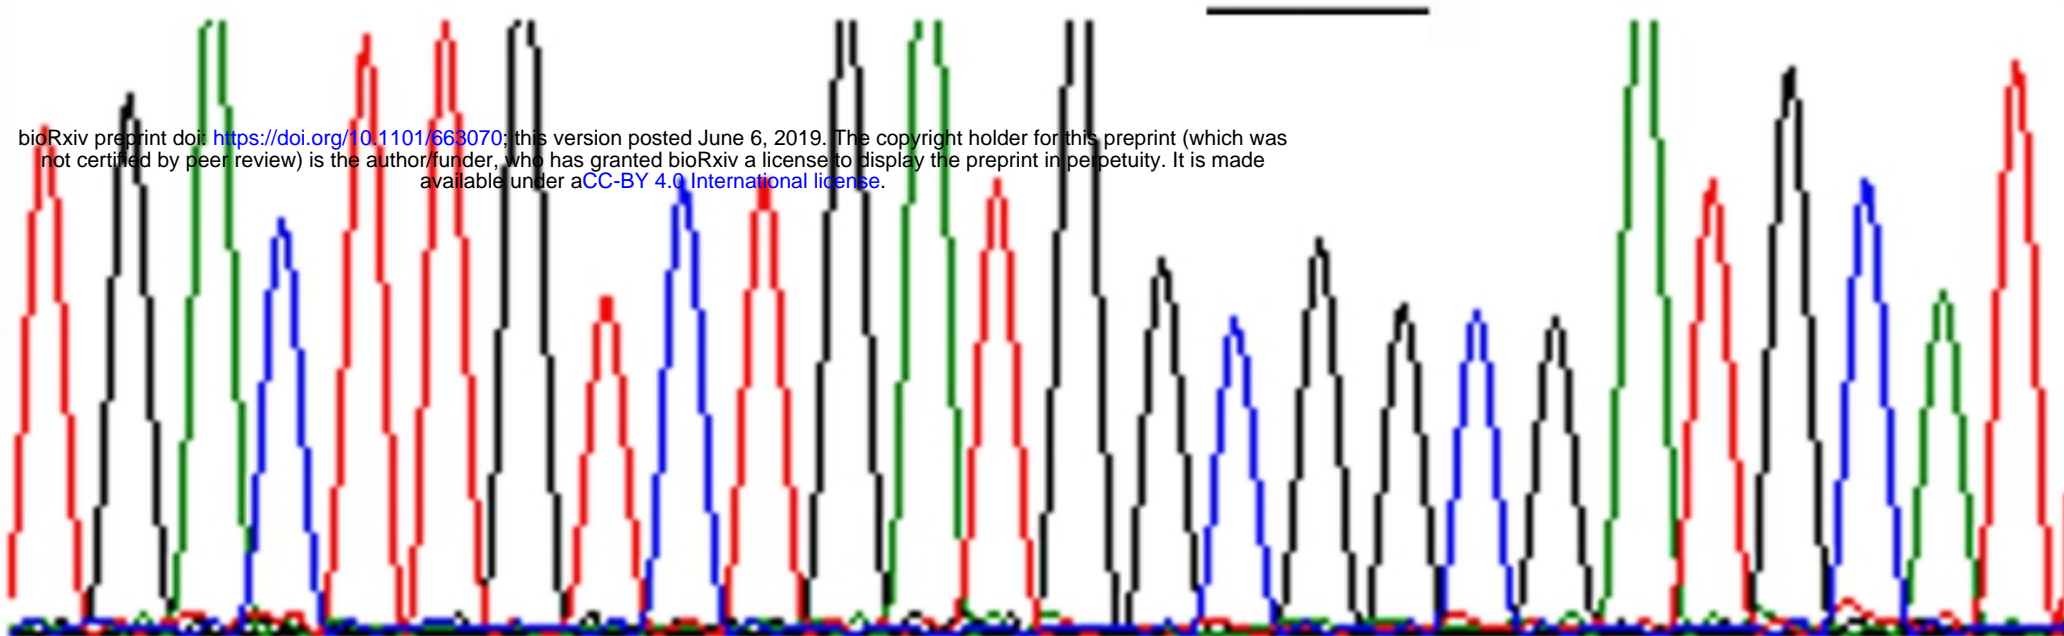

bioRxiv preprint doi: <https://doi.org/10.1101/663070>; this version posted June 6, 2019. The copyright holder for this preprint (which was not certified by peer review) is the author/funder, who has granted bioRxiv a license to display the preprint in perpetuity. It is made available under aCC-BY 4.0 International license.

72 **GTCRGSRS DLSDDRE** EQT ~ ~ **ALTLWL** 282  
**GTCRGSRS DLSDD** GG DAL 89

**b**

G G A G G A G G C A A A C G G C G G C G A T G C A T

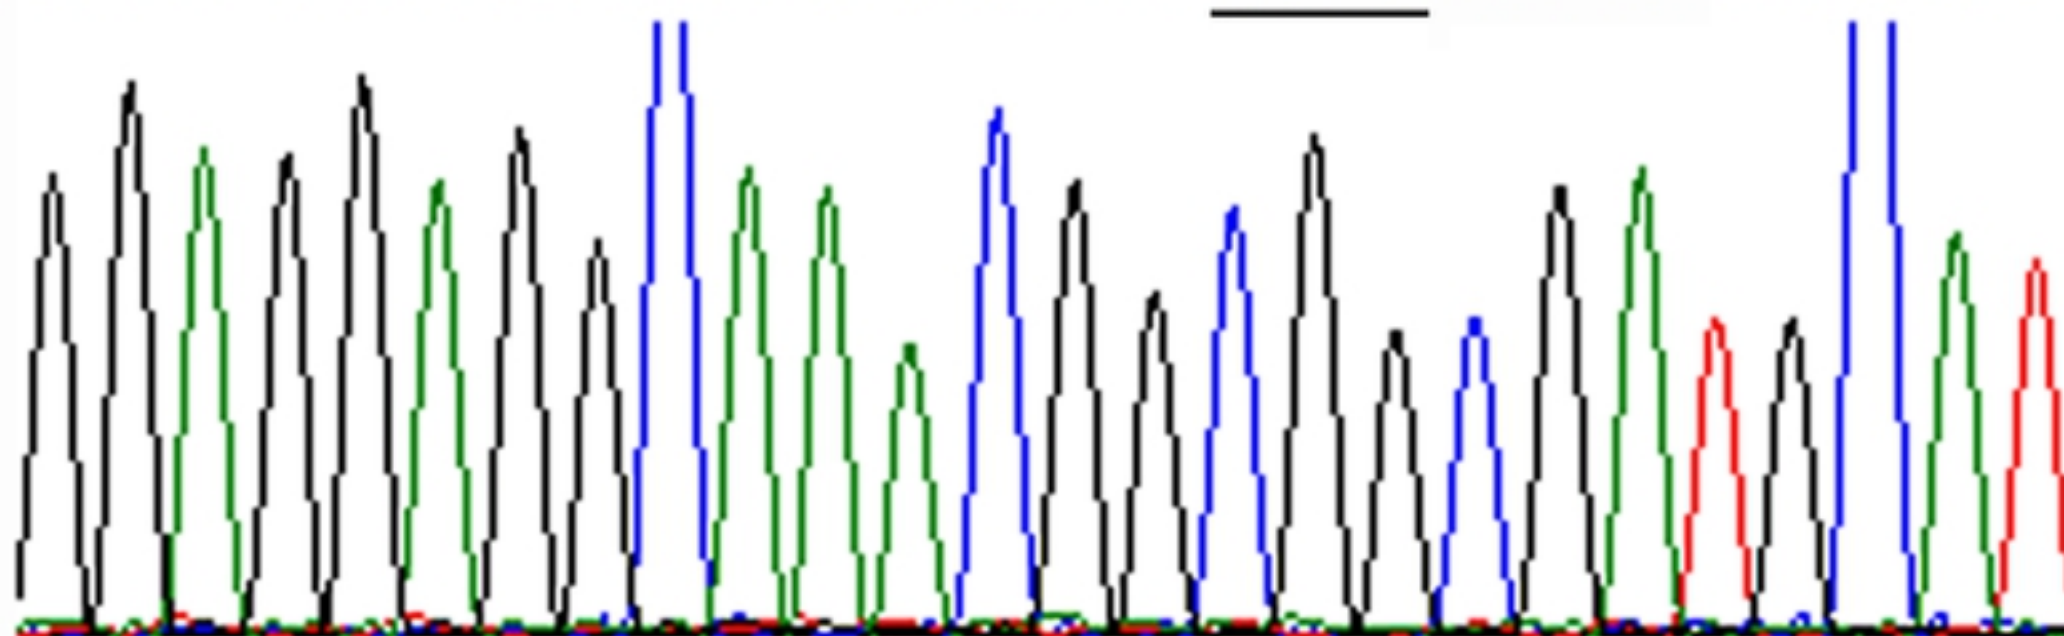

215 **PEVVWLVAEEA** TAAMHC ~ ~ **ALTLWL** 282  
**PEVVWLVAEEA** NGG DAL 232

Figure 6

# Plant transformation

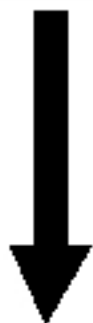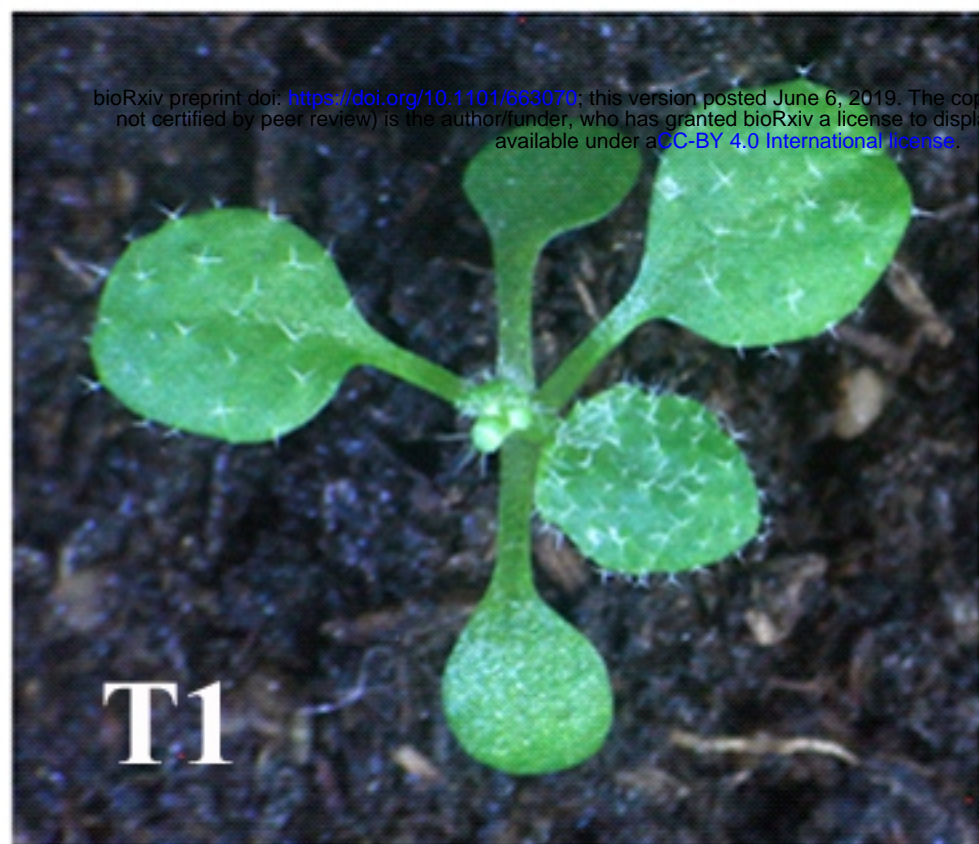

Sequence to identify gene edited plants from early bolting plants

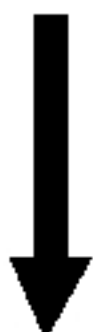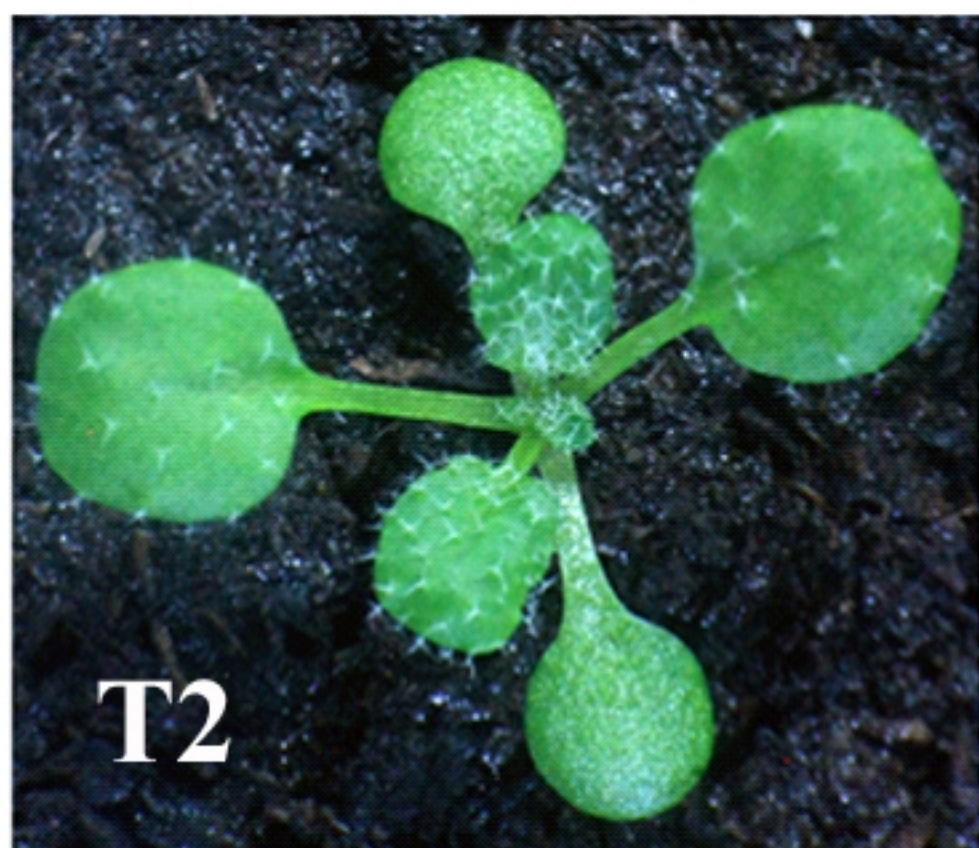

Sequence to identify homozygous mutants from normal bolting plants

Figure 7
